# Supplementary material
Source: PubMed Central journal article supplement (PMC2884266)
Supplement: mmc1.pdf [file mmc1.pdf]

Biophysical Journal, Volume 98

**Supporting Material**

**Molecular dynamics free energy calculations to assess the possibility of water existence in protein nonpolar cavities**

Masataka Oikawa and Yoshiteru Yonetani

## Supporting Material

Cavity hydration free energy  $\Delta G_{\text{hyd}}^{0 \rightarrow n}$  has the four terms:

$$\Delta G_{\text{hyd}}^{0 \rightarrow n} = \Delta G_{\text{cavity}}^{0 \rightarrow n} - n\Delta G_{\text{bulk}}^{0 \rightarrow 1} - nk_{\text{B}}T \ln \left[ \rho_{\text{bulk}} (2\pi k_{\text{B}}T / k_{\text{harm}})^{3/2} \right] + k_{\text{B}}T \ln n!$$

The first term  $\Delta G_{\text{cavity}}^{0 \rightarrow n}$  is the sum of three components. These were calculated from the three different processes in which the restraining, electrostatic and vdW potentials were changed, respectively,

$$\begin{aligned} (U_1^{\text{ele}}, U_1^{\text{vdW}}, 0) &\rightarrow (U_1^{\text{ele}}, U_1^{\text{vdW}}, u^{\text{res}}) && : (\text{res}) \\ &\rightarrow (U_0^{\text{ele}}, U_1^{\text{vdW}}, u^{\text{res}}) && : (\text{ele}) \\ &\rightarrow (U_0^{\text{ele}}, U_0^{\text{vdW}}, u^{\text{res}}) && : (\text{vdW}) \end{aligned}$$

All the components are shown in the following Tables S1 (rigid) and S2 (flexible).

Table S1: Free energies calculated with the rigid model and their components [kcal/mol].

|                                              | Number of water molecules $n$ |      |       |       | Number of water molecules $n$ |      |       |       |
|----------------------------------------------|-------------------------------|------|-------|-------|-------------------------------|------|-------|-------|
|                                              | 1                             | 2    | 3     | 4     | 1                             | 2    | 3     | 4     |
|                                              | <b>IL-1<math>\beta</math></b> |      |       |       | <b>AvrPphB</b>                |      |       |       |
| $\Delta G_{\text{cavity}}^{0 \rightarrow n}$ | -1.5                          | -5.6 | -8.4  | -10.2 | -1.5                          | -4.7 | -7.6  | -8.6  |
| (res)                                        | -0.3                          | -0.6 | -1.5  | -1.9  | -0.2                          | -0.9 | -2.2  | -3.1  |
| (ele)                                        | -0.3                          | 1.8  | 5.2   | 10.5  | -0.8                          | 0.9  | 5.4   | 10.7  |
| (vdW)                                        | -0.9                          | -6.8 | -12.1 | -18.8 | -0.4                          | -4.6 | -10.8 | -16.2 |
| $-n\Delta G_{\text{bulk}}^{0 \rightarrow 1}$ | 6.3                           | 12.5 | 18.8  | 25.0  | 6.3                           | 12.5 | 18.8  | 25.0  |
| $\Delta G_{\text{harm}}^{0 \rightarrow n} *$ | 0.2                           | 0.3  | 0.5   | 0.6   | -0.3                          | -0.6 | -0.9  | -1.2  |
| $k_{\text{B}}T \ln n!$                       | 0.0                           | 0.4  | 1.1   | 1.9   | 0.0                           | 0.4  | 1.1   | 1.9   |
| $\Delta G_{\text{hyd}}^{0 \rightarrow n}$    | 4.9                           | 7.6  | 11.9  | 17.3  | 4.5                           | 7.7  | 11.4  | 17.2  |
|                                              | <b>trp repressor</b>          |      |       |       | <b>hemoglobin</b>             |      |       |       |
| $\Delta G_{\text{cavity}}^{0 \rightarrow n}$ | -                             | -    | -     | -     | -1.5                          | -2.6 | -     | -     |
| (res)                                        | -                             | -    | -     | -     | -0.3                          | -0.6 | -     | -     |
| (ele)                                        | -                             | -    | -     | -     | 0.2                           | 0.6  | -     | -     |
| (vdW)                                        | -                             | -    | -     | -     | -1.4                          | -2.7 | -     | -     |
| $-n\Delta G_{\text{bulk}}^{0 \rightarrow 1}$ | -                             | -    | -     | -     | 6.4                           | 12.8 | -     | -     |
| $\Delta G_{\text{harm}}^{0 \rightarrow n} *$ | -                             | -    | -     | -     | -1.1                          | -2.2 | -     | -     |
| $k_{\text{B}}T \ln n!$                       | -                             | -    | -     | -     | 0.0                           | 0.4  | -     | -     |
| $\Delta G_{\text{hyd}}^{0 \rightarrow n}$    | -                             | -    | -     | -     | 3.8                           | 8.4  | -     | -     |

$$* \Delta G_{\text{harm}}^{0 \rightarrow n} = -nk_{\text{B}}T \ln \left[ \rho_{\text{bulk}} (2\pi k_{\text{B}}T / k_{\text{harm}})^{3/2} \right]$$

Table S2: Free energies calculated with the flexible model and their components [kcal/mol].

|                                              | Number of water molecules $n$ |      |       |       | Number of water molecules $n$ |       |       |       |
|----------------------------------------------|-------------------------------|------|-------|-------|-------------------------------|-------|-------|-------|
|                                              | 1                             | 2    | 3     | 4     | 1                             | 2     | 3     | 4     |
|                                              | <b>IL-1<math>\beta</math></b> |      |       |       | <b>AvrPphB</b>                |       |       |       |
| $\Delta G_{\text{cavity}}^{0 \rightarrow n}$ | -2.5                          | -    | -     | -17.0 | -2.2                          | -10.2 | -11.6 | -20.4 |
| (res)                                        | -0.6                          | -    | -     | -2.5  | -0.8                          | -5.6  | -3.2  | -8.8  |
| (ele)                                        | -0.6                          | -    | -     | 3.3   | -0.7                          | 0.6   | 1.7   | 4.6   |
| (vdW)                                        | -1.3                          | -    | -     | -17.8 | -0.8                          | -5.2  | -10.1 | -16.3 |
| $-n\Delta G_{\text{bulk}}^{0 \rightarrow 1}$ | 6.3                           | -    | -     | 25.0  | 6.3                           | 12.5  | 18.8  | 25.0  |
| $\Delta G_{\text{harm}}^{0 \rightarrow n} *$ | 0.2                           | -    | -     | 0.6   | -0.3                          | -0.6  | -0.9  | -1.2  |
| $k_{\text{B}}T \ln n!$                       | 0.0                           | -    | -     | 1.9   | 0.0                           | 0.4   | 1.1   | 1.9   |
| $\Delta G_{\text{hyd}}^{0 \rightarrow n}$    | 3.9                           | -    | -     | 10.5  | 3.7                           | 2.1   | 7.4   | 5.3   |
|                                              | <b>trp repressor</b>          |      |       |       | <b>hemoglobin</b>             |       |       |       |
| $\Delta G_{\text{cavity}}^{0 \rightarrow n}$ | -2.5                          | -5.9 | -10.4 | -16.9 | -3.7                          | -7.8  | -9.8  | -     |
| (res)                                        | -1.2                          | -1.7 | -3.1  | -5.7  | -2.2                          | -2.7  | -3.0  | -     |
| (ele)                                        | -1.0                          | 0.7  | 2.4   | 4.3   | 0.2                           | 0.7   | 1.5   | -     |
| (vdW)                                        | -0.3                          | -4.9 | -9.6  | -15.5 | -1.6                          | -5.8  | -8.3  | -     |
| $-n\Delta G_{\text{bulk}}^{0 \rightarrow 1}$ | 6.3                           | 12.5 | 18.8  | 25.0  | 6.4                           | 12.8  | 19.2  | -     |
| $\Delta G_{\text{harm}}^{0 \rightarrow n} *$ | -0.1                          | -0.1 | -0.2  | -0.3  | -1.1                          | -2.2  | -3.3  | -     |
| $k_{\text{B}}T \ln n!$                       | 0.0                           | 0.4  | 1.1   | 1.9   | 0.0                           | 0.4   | 1.1   | -     |
| $\Delta G_{\text{hyd}}^{0 \rightarrow n}$    | 3.7                           | 6.9  | 9.2   | 9.8   | 1.6                           | 3.2   | 7.1   | -     |

$$* \Delta G_{\text{harm}}^{0 \rightarrow n} = -nk_{\text{B}}T \ln \left[ \rho_{\text{bulk}} (2\pi k_{\text{B}}T / k_{\text{harm}})^{3/2} \right]$$
